# Supplementary material for: Disease Burden, Clinical Outcomes, and Quality of Life in People with Hemophilia A without Inhibitors in Europe: Analyses from CHESS II/CHESS PAEDs
Source: PubMed Central journal article supplement (PMC11018388; doi:10.1055/s-0044-1785524), 2024-04-15
Supplement: 10-1055-s-0044-1785524-s23110046.pdf [file 10-1055-s-0044-1785524-s23110046.pdf]

**Supplementary Material S1** Glossary

| Term                  | Definition                                                                                                                               |
|-----------------------|------------------------------------------------------------------------------------------------------------------------------------------|
| Hemophilia A          | A deficiency or absence of factor VIII. The most common form of hemophilia, also called “classic hemophilia”                             |
| Moderate hemophilia   | A factor VIII or IX level ranging from 1 to 5% of normal blood levels                                                                    |
| Severe hemophilia     | A factor VIII or IX level below 1% of normal blood levels                                                                                |
| Prophylaxis           | A treatment regimen to prevent bleeds                                                                                                    |
| Target joint          | A joint that has had repeated bleeds, or at least four bleeds within a 6-mo period                                                       |
| Problem joint         | A joint with chronic pain and/or a limited range of movement                                                                             |
| Treatment adherence   | The process by which patients take their medication as prescribed                                                                        |
| No chronic pain       | No functional deficit; no analgesic use (except with acute hemarthrosis)                                                                 |
| Mild chronic pain     | Pain that does not interfere with occupation nor with activities of daily living (ADL) but may require occasional non-narcotic analgesic |
| Moderate chronic pain | Pain causing partial or occasional interference with occupation or ADL; the individual makes use of non-narcotic medications             |
| Severe chronic pain   | Pain interfering with occupation or ADL; requires frequent use of non-narcotic and narcotic medications                                  |

**Supplementary Table S1** CHES II outcomes evaluated by country of origin

|                                            | Country       |                |               |                |              |              |               |                |
|--------------------------------------------|---------------|----------------|---------------|----------------|--------------|--------------|---------------|----------------|
|                                            | Germany       | Spain          | France        | Italy          | Romania      | Holland      | UK            | Total          |
|                                            | <i>n</i> = 37 | <i>n</i> = 149 | <i>n</i> = 42 | <i>n</i> = 188 | <i>n</i> = 3 | <i>n</i> = 1 | <i>n</i> = 48 | <i>N</i> = 468 |
| ABR                                        |               |                |               |                |              |              |               |                |
| <i>n</i>                                   | 37            | 149            | 42            | 188            | 3            | 1            | 48            | 468            |
| Mean (SD)                                  | 1.59 (1.55)   | 3.84 (8.55)    | 2.24 (2.23)   | 3.49 (3.07)    | 0.67 (1.15)  | 1.00 (N/A)   | 4.00 (1.69)   | 3.35 (5.39)    |
| Median (IQR)                               | 1 (2)         | 2 (3)          | 2 (2)         | 3 (3)          | 0 (2)        | 1 (0)        | 4 (1.5)       | 2 (3)          |
| ABR category, <i>n</i> (%)                 |               |                |               |                |              |              |               |                |
| 0                                          | 10 (27.0)     | 14 (9.4)       | 7 (16.7)      | 16 (8.5)       | 2 (66.7)     | 0 (0.0)      | 0 (0.0)       | 49 (10.5)      |
| 1                                          | 12 (32.4)     | 42 (28.2)      | 13 (31.0)     | 35 (18.6)      | 0 (0.0)      | 1 (100.0)    | 2 (4.2)       | 105 (22.4)     |
| 2+                                         | 15 (40.5)     | 93 (62.4)      | 22 (52.4)     | 137 (72.9)     | 1 (33.3)     | 0 (0.0)      | 46 (95.8)     | 314 (67.1)     |
| Number of target joints                    |               |                |               |                |              |              |               |                |
| <i>n</i>                                   | 37            | 149            | 42            | 188            | 3            | 1            | 48            | 468            |
| Mean (SD)                                  | 0.32 (0.67)   | 0.82 (1.15)    | 0.45 (0.94)   | 0.59 (0.83)    | 0.00 (0.00)  | 0.00 (0.0)   | 0.17 (0.48)   | 0.58 (0.93)    |
| Median (IQR)                               | 0 (0)         | 0 (1)          | 0 (0)         | 0 (1)          | 0 (0)        | 0 (0)        | 0 (0)         | 0 (1)          |
| Target joint number category, <i>n</i> (%) |               |                |               |                |              |              |               |                |
| None                                       | 28 (75.7)     | 82 (55.0)      | 32 (76.2)     | 113 (60.1)     | 3 (100.0)    | 1 (100.0)    | 42 (87.5)     | 301 (64.3)     |
| 1 target joint                             | 7 (18.9)      | 32 (21.5)      | 4 (9.5)       | 44 (23.4)      | 0 (0.0)      | 0 (0.0)      | 4 (8.3)       | 91 (19.4)      |
| 2+ target joints                           | 2 (5.4)       | 35 (23.5)      | 6 (14.3)      | 31 (16.5)      | 0 (0.0)      | 0 (0.0)      | 2 (4.2)       | 76 (16.2)      |
| Current chronic pain level, <i>n</i> (%)   |               |                |               |                |              |              |               |                |
| No pain                                    | 12 (32.4)     | 48 (32.2)      | 23 (54.8)     | 32 (17.0)      | 1 (33.3)     | 0 (0.0)      | 6 (12.5)      | 122 (26.1)     |
| Mild pain                                  | 16 (43.2)     | 48 (32.2)      | 18 (42.9)     | 89 (47.3)      | 1 (33.3)     | 1 (100.0)    | 16 (33.3)     | 189 (40.4)     |
| Moderate pain                              | 9 (24.3)      | 44 (29.5)      | 1 (2.4)       | 53 (28.2)      | 0 (0.0)      | 0 (0.0)      | 19 (39.6)     | 126 (26.9)     |
| Severe pain                                | 0 (0.0)       | 9 (6.0)        | 0 (0.0)       | 14 (7.4)       | 1 (33.3)     | 0 (0.0)      | 7 (14.6)      | 31 (6.6)       |
| % with anxiety, <i>n</i> (%)               | 2 (5.4)       | 36 (24.2)      | 3 (7.1)       | 39 (20.7)      | 0 (0.0)      | 0 (0.0)      | 6 (12.5)      | 86 (18.4)      |
| % with depression, <i>n</i> (%)            | 2 (5.4)       | 20 (13.4)      | 2 (4.8)       | 22 (11.7)      | 0 (0.0)      | 0 (0.0)      | 3 (6.3)       | 49 (10.5)      |

Supplementary Table S1 (Continued)

|                                                      | Country     |             |             |             |              |              |             |             |
|------------------------------------------------------|-------------|-------------|-------------|-------------|--------------|--------------|-------------|-------------|
|                                                      | Germany     | Spain       | France      | Italy       | Romania      | Holland      | UK          | Total       |
|                                                      | n = 37      | n = 149     | n = 42      | n = 188     | n = 3        | n = 1        | n = 48      | N = 468     |
| EQ-5D                                                |             |             |             |             |              |              |             |             |
| n                                                    | 4           | 80          | 26          | 83          | No           | No           | 12          | 205         |
| Mean (SD)                                            | 0.79 (0.12) | 0.72 (0.20) | 0.85 (0.15) | 0.64 (0.28) | observations | observations | 0.75 (0.18) | 0.71 (0.3)  |
| Median (IQR)                                         | 0.8 (0.2)   | 0.74 (0.29) | 0.88 (0.27) | 0.67 (0.31) |              |              | 0.68 (0.36) | 0.71 (0.24) |
| Had to reduce or give up social activities, n (%)    | n = 4       | n = 80      | n = 25      | n = 84      | n = 0        | n = 0        | n = 12      | n = 205     |
| Strongly agree                                       | 0 (0.0)     | 18 (22.5)   | 6 (24.0)    | 17 (20.2)   | 0 (0.0)      | 0 (0.0)      | 0 (0.0)     | 41 (20.0)   |
| Agree                                                | 1 (25.0)    | 29 (36.3)   | 5 (20.0)    | 30 (35.7)   | 0 (0.0)      | 0 (0.0)      | 4 (33.3)    | 69 (33.7)   |
| Neither agree nor disagree                           | 0 (0.0)     | 14 (17.5)   | 8 (32.0)    | 13 (15.5)   | 0 (0.0)      | 0 (0.0)      | 0 (0.0)     | 35 (17.1)   |
| Disagree                                             | 2 (50.0)    | 12 (15.0)   | 3 (12.0)    | 17 (20.2)   | 0 (0.0)      | 0 (0.0)      | 4 (33.3)    | 38 (18.5)   |
| Strongly disagree                                    | 1 (25.0)    | 7 (8.8)     | 3 (12.0)    | 7 (8.3)     | 0 (0.0)      | 0 (0.0)      | 4 (33.3)    | 22 (10.7)   |
| Had to reduce or give up exercise, n (%)             | n = 4       | n = 80      | n = 25      | n = 84      | n = 0        | n = 0        | n = 12      | n = 205     |
| Strongly agree                                       | 0 (0.0)     | 25 (31.3)   | 6 (24.0)    | 21 (25.0)   | 0 (0.0)      | 0 (0.0)      | 1 (8.3)     | 53 (25.9)   |
| Agree                                                | 2 (50.0)    | 31 (38.8)   | 4 (16.0)    | 28 (33.3)   | 0 (0.0)      | 0 (0.0)      | 3 (25.0)    | 68 (33.2)   |
| Neither agree nor disagree                           | 1 (25.0)    | 9 (11.3)    | 8 (32.0)    | 10 (11.9)   | 0 (0.0)      | 0 (0.0)      | 1 (8.3)     | 29 (14.1)   |
| Disagree                                             | 1 (25.0)    | 11 (13.8)   | 5 (20.0)    | 16 (19.0)   | 0 (0.0)      | 0 (0.0)      | 3 (25.0)    | 36 (17.6)   |
| Strongly disagree                                    | 0 (0.0)     | 4 (5.0)     | 2 (8.0)     | 9 (10.7)    | 0 (0.0)      | 0 (0.0)      | 4 (33.3)    | 19 (9.3)    |
| Miss out on opportunities, n (%)                     | n = 4       | n = 80      | n = 25      | n = 84      | n = 0        | n = 0        | n = 12      | n = 205     |
| Strongly agree                                       | 0 (0.0)     | 17 (21.3)   | 5 (20.0)    | 15 (17.9)   | 0 (0.0)      | 0 (0.0)      | 0 (0.0)     | 37 (18.0)   |
| Agree                                                | 1 (25.0)    | 31 (38.8)   | 8 (32.0)    | 33 (39.3)   | 0 (0.0)      | 0 (0.0)      | 4 (33.3)    | 77 (37.6)   |
| Neither agree nor disagree                           | 0 (0.0)     | 15 (18.8)   | 5 (20.0)    | 13 (15.5)   | 0 (0.0)      | 0 (0.0)      | 0 (0.0)     | 33 (16.1)   |
| Disagree                                             | 3 (75.0)    | 12 (15.0)   | 5 (20.0)    | 14 (16.7)   | 0 (0.0)      | 0 (0.0)      | 3 (25.0)    | 37 (18.0)   |
| Strongly disagree                                    | 0 (0.0)     | 5 (6.3)     | 2 (8.0)     | 9 (10.7)    | 0 (0.0)      | 0 (0.0)      | 5 (41.7)    | 21 (10.2)   |
| Feel frustrated by the influence on lifestyle, n (%) | n = 4       | n = 80      | n = 25      | n = 84      | n = 0        | n = 0        | n = 12      | n = 205     |
| Strongly agree                                       | 0 (0.0)     | 15 (18.8)   | 6 (24.0)    | 13 (15.5)   | 0 (0.0)      | 0 (0.0)      | 1 (8.3)     | 35 (17.1)   |
| Agree                                                | 0 (0.0)     | 25 (31.3)   | 7 (28.0)    | 36 (42.9)   | 0 (0.0)      | 0 (0.0)      | 2 (16.7)    | 70 (34.1)   |
| Neither agree nor disagree                           | 1 (25.0)    | 13 (16.3)   | 7 (28.0)    | 11 (13.1)   | 0 (0.0)      | 0 (0.0)      | 2 (16.7)    | 34 (16.6)   |
| Disagree                                             | 3 (75.0)    | 21 (26.3)   | 3 (12.0)    | 14 (16.7)   | 0 (0.0)      | 0 (0.0)      | 2 (16.7)    | 43 (21.0)   |
| Strongly disagree                                    | 0 (0.0)     | 6 (7.5)     | 2 (8.0)     | 10 (11.9)   | 0 (0.0)      | 0 (0.0)      | 5 (41.7)    | 23 (11.2)   |

Abbreviations: ABR, annualized bleeding rate; EQ-5D, EuroQol-5 Dimension; IQR, interquartile range; SD, standard deviation.

**Supplementary Table S2** CHES PAEDs outcomes evaluated by country of origin

|                                                                | Country        |                |                |                |                |                |
|----------------------------------------------------------------|----------------|----------------|----------------|----------------|----------------|----------------|
|                                                                | France         | Germany        | Italy          | Spain          | UK             | Total          |
|                                                                | <i>n</i> = 148 | <i>n</i> = 112 | <i>n</i> = 167 | <i>n</i> = 168 | <i>n</i> = 108 | <i>N</i> = 703 |
| ABR,                                                           |                |                |                |                |                |                |
| <i>n</i>                                                       | 147            | 112            | 166            | 161            | 105            | 691            |
| Mean (SD)                                                      | 1.56 (1.38)    | 1.64 (1.54)    | 2.91 (3.51)    | 2.81 (3.14)    | 10.99 (20.59)  | 3.62 (8.94)    |
| Median (IQR)                                                   | 1 (2)          | 1 (3)          | 2 (4)          | 2 (3)          | 4 (7)          | 2 (4)          |
| ABR category, <i>n</i> (%)                                     |                |                |                |                |                |                |
| 0                                                              | 42 (28.4)      | 35 (31.3)      | 52 (31.1)      | 35 (20.8)      | 19 (17.6)      | 183 (26.0)     |
| 1                                                              | 33 (22.3)      | 26 (23.2)      | 30 (18.0)      | 39 (23.2)      | 6 (5.6)        | 134 (19.1)     |
| 2+                                                             | 73 (49.3)      | 51 (45.5)      | 85 (50.9)      | 94 (56.0)      | 83 (76.9)      | 386 (54.9)     |
| ABR physician reported                                         |                |                |                |                |                |                |
| <i>n</i>                                                       | 147            | 112            | 166            | 161            | 105            | 691            |
| Mean (SD)                                                      | 2.73 (3.96)    | 1.96 (1.42)    | 2.74 (3.46)    | 2.93 (2.85)    | 12.41 (22.72)  | 4.12 (9.93)    |
| Median (IQR)                                                   | 2 (2)          | 2 (2)          | 2 (3)          | 2 (3)          | 2 (18)         | 2 (3)          |
| ABR category physician reported, <i>n</i> (%)                  |                |                |                |                |                |                |
| 0                                                              | 14 (9.5)       | 14 (17.5)      | 37 (22.2)      | 17 (10.1)      | 13 (12.0)      | 95 (13.5)      |
| 1                                                              | 31 (20.9)      | 35 (31.3)      | 37 (22.2)      | 39 (23.2)      | 14 (13.0)      | 156 (22.2)     |
| 2+                                                             | 103 (69.6)     | 63 (56.3)      | 93 (55.7)      | 112 (66.7)     | 81 (75.0)      | 452 (64.3)     |
| % with zero bleeds (from physician-reported ABR), <i>n</i> (%) | 14 (9.5)       | 14 (12.5)      | 37 (22.2)      | 17 (10.1)      | 13 (12.0)      | 95 (13.5)      |
| Number of target joints                                        |                |                |                |                |                |                |
| <i>n</i>                                                       | 148            | 112            | 167            | 168            | 108            | 703            |
| Mean (SD)                                                      | 0.23 (0.54)    | 0.13 (0.41)    | 0.15 (0.39)    | 0.27 (0.61)    | 0.19 (0.46)    | 0.20 (0.50)    |
| Median (IQR)                                                   | 0 (0)          | 0 (0)          | 0 (0)          | 0 (0)          | 0 (0)          | 0 (0)          |
| Target joint number category, <i>n</i> (%)                     |                |                |                |                |                |                |
| None                                                           | 121 (81.8)     | 100 (89.3)     | 144 (86.2)     | 132 (78.6)     | 91 (84.3)      | 588 (83.6)     |
| 1 target joint                                                 | 21 (14.2)      | 9 (8.0)        | 21 (12.6)      | 30 (17.9)      | 14 (13.0)      | 95 (13.5)      |
| 2+ target joints                                               | 6 (4.1)        | 3 (2.7)        | 2 (1.2)        | 6 (3.6)        | 3 (2.8)        | 20 (2.8)       |
| Level of chronic pain, <i>n</i> (%)                            | <i>n</i> = 147 | <i>n</i> = 112 | <i>n</i> = 166 | <i>n</i> = 161 | <i>n</i> = 105 | <i>n</i> = 691 |
| No pain                                                        | 53 (36.1)      | 59 (52.7)      | 58 (34.9)      | 68 (42.2)      | 47 (44.8)      | 285 (41.2)     |
| Mild pain                                                      | 68 (46.3)      | 44 (39.3)      | 80 (48.2)      | 67 (41.6)      | 37 (35.2)      | 296 (42.8)     |
| Moderate pain                                                  | 26 (17.7)      | 9 (8.0)        | 28 (16.9)      | 25 (15.5)      | 20 (19.0)      | 108 (15.6)     |
| Severe pain                                                    | 0 (0.0)        | 0 (0.0)        | 0 (0.0)        | 1 (0.6)        | 1 (1.0)        | 2 (0.3)        |
| Anxiety, <i>n</i> (%)                                          | 19 (12.9)      | 2 (1.8)        | 11 (6.6)       | 17 (10.6)      | 7 (6.7)        | 56 (8.1)       |
| Depression, <i>n</i> (%)                                       | 0 (0.0)        | 1 (0.9)        | 2 (1.2)        | 8 (5.0)        | 2 (1.9)        | 13 (1.9)       |
| EQ-5D-Y score for children >8,                                 |                |                |                |                |                |                |
| <i>n</i>                                                       | 21             | 32             | 13             | 19             | 36             | 121            |
| Mean (SD)                                                      | 0.73 (0.15)    | 0.65 (0.26)    | 0.54 (0.37)    | 0.60 (0.36)    | 0.68 (0.29)    | 0.65 (0.29)    |
| Median (IQR)                                                   | 0.73 (0.11)    | 0.69 (0.2)     | 0.69 (0.21)    | 0.76 (0.54)    | 0.67 (0.47)    | 0.69 (0.22)    |
| Had to reduce or give up social activities, <i>n</i> (%)       | <i>n</i> = 33  | <i>n</i> = 44  | <i>n</i> = 26  | <i>n</i> = 31  | <i>n</i> = 39  | <i>n</i> = 173 |
| Strongly agree                                                 | 8 (24.2)       | 4 (9.1)        | 0 (0.0)        | 0 (0.0)        | 0 (0.0)        | 12 (6.9)       |
| Agree                                                          | 8 (24.2)       | 8 (18.2)       | 6 (23.1)       | 10 (32.3)      | 1 (2.6)        | 33 (19.1)      |

Supplementary Table S2 (Continued)

|                                                                                       | Country        |                |                |                |                |                |
|---------------------------------------------------------------------------------------|----------------|----------------|----------------|----------------|----------------|----------------|
|                                                                                       | France         | Germany        | Italy          | Spain          | UK             | Total          |
|                                                                                       | <i>n</i> = 148 | <i>n</i> = 112 | <i>n</i> = 167 | <i>n</i> = 168 | <i>n</i> = 108 | <i>N</i> = 703 |
| Neither agree nor disagree                                                            | 4 (12.1)       | 9 (20.5)       | 8 (30.8)       | 4 (12.9)       | 10 (25.6)      | 35 (20.2)      |
| Disagree                                                                              | 12 (36.4)      | 19 (43.2)      | 11 (42.3)      | 13 (41.9)      | 26 (66.7)      | 81 (46.8)      |
| Strongly disagree                                                                     | 1 (3.0)        | 4 (9.1)        | 1 (3.8)        | 4 (12.9)       | 2 (5.1)        | 12 (6.9)       |
| Had to reduce or give up exercise, <i>n</i> (%)                                       | <i>n</i> = 33  | <i>n</i> = 44  | <i>n</i> = 26  | <i>n</i> = 32  | <i>n</i> = 39  | <i>n</i> = 174 |
| Strongly agree                                                                        | 8 (24.2)       | 0 (0.0)        | 0 (0.0)        | 0 (0.0)        | 0 (0.0)        | 8 (4.6)        |
| Agree                                                                                 | 1 (3.0)        | 5 (11.4)       | 6 (23.1)       | 5 (15.6)       | 5 (12.8)       | 22 (12.6)      |
| Neither agree nor disagree                                                            | 3 (9.1)        | 12 (27.3)      | 10 (38.5)      | 9 (28.1)       | 14 (35.9)      | 48 (27.6)      |
| Disagree                                                                              | 16 (48.5)      | 23 (52.3)      | 9 (34.6)       | 13 (40.6)      | 13 (33.3)      | 74 (42.5)      |
| Strongly disagree                                                                     | 5 (15.2)       | 4 (9.1)        | 1 (3.8)        | 5 (15.6)       | 7 (17.9)       | 22 (12.6)      |
| Miss out on opportunities, <i>n</i> (%)                                               | <i>n</i> = 33  | <i>n</i> = 44  | <i>n</i> = 26  | <i>n</i> = 32  | <i>n</i> = 39  | <i>n</i> = 174 |
| Strongly agree                                                                        | 6 (18.2)       | 0 (0.0)        | 0 (0.0)        | 0 (0.0)        | 1 (2.6)        | 7 (4.0)        |
| Agree                                                                                 | 3 (9.1)        | 8 (18.2)       | 4 (15.4)       | 5 (15.6)       | 6 (15.4)       | 26 (14.9)      |
| Neither agree nor disagree                                                            | 5 (15.2)       | 17 (38.6)      | 11 (42.3)      | 13 (40.6)      | 13 (33.3)      | 59 (33.9)      |
| Disagree                                                                              | 19 (57.6)      | 16 (36.4)      | 11 (42.3)      | 11 (34.4)      | 16 (41.0)      | 73 (42.0)      |
| Strongly disagree                                                                     | 0 (0.0)        | 3 (6.8)        | 0 (0.0)        | 3 (9.4)        | 3 (7.7)        | 9 (5.2)        |
| Feel frustrated by the influence on lifestyle, <i>n</i> (%)                           | <i>n</i> = 33  | <i>n</i> = 44  | <i>n</i> = 26  | <i>n</i> = 32  | <i>n</i> = 39  | <i>n</i> = 174 |
| Strongly agree                                                                        | 3 (9.1)        | 0 (0.0)        | 0 (0.0)        | 1 (3.1)        | 0 (0.0)        | 4 (2.3)        |
| Agree                                                                                 | 5 (15.2)       | 6 (13.6)       | 2 (7.7)        | 10 (31.3)      | 2 (5.1)        | 25 (14.4)      |
| Neither agree nor disagree                                                            | 7 (21.2)       | 22 (50.0)      | 9 (34.6)       | 7 (21.9)       | 15 (38.5)      | 60 (34.5)      |
| Disagree                                                                              | 17 (51.5)      | 15 (34.1)      | 13 (50.0)      | 11 (34.4)      | 18 (46.2)      | 74 (42.5)      |
| Strongly disagree                                                                     | 1 (3.0)        | 1 (2.3)        | 2 (7.7)        | 3 (9.4)        | 4 (10.3)       | 11 (6.3)       |
| Parent/guardian providing care for a pediatric relative with hemophilia, <i>n</i> (%) | <i>n</i> = 29  | <i>n</i> = 43  | <i>n</i> = 26  | <i>n</i> = 34  | <i>n</i> = 39  | <i>n</i> = 171 |
| Yes                                                                                   | 26 (89.7)      | 13 (30.2)      | 24 (92.3)      | 26 (76.5)      | 31 (79.5)      | 120 (70.2)     |
| No                                                                                    | 3 (10.3)       | 30 (69.8)      | 2 (7.7)        | 8 (23.5)       | 8 (20.5)       | 51 (29.8)      |
| Hours spent caring in a week                                                          |                |                |                |                |                |                |
| <i>N</i>                                                                              | 26             | 13             | 22             | 26             | 31             | 118            |
| Mean (SD)                                                                             | 9.24 (11.81)   | 18.92 (11.49)  | 18.36 (10.95)  | 49.58 (37.14)  | 11.68 (7.52)   | 21.54 (24.72)  |
| Median (IQR)                                                                          | 4 (10)         | 20 (9)         | 15 (20)        | 59 (70)        | 9 (14)         | 12 (18)        |
| Do your duties prevent you from working / working more hours? <i>n</i> (%)            | <i>n</i> = 19  | <i>n</i> = 13  | <i>n</i> = 21  | <i>n</i> = 17  | <i>n</i> = 23  | <i>n</i> = 93  |
| Yes                                                                                   | 0 (0.0)        | 1 (7.7)        | 2 (9.5)        | 5 (29.4)       | 12 (52.2)      | 20 (21.5)      |
| No                                                                                    | 19 (100.0)     | 10 (76.9)      | 15 (71.4)      | 7 (41.2)       | 9 (39.1)       | 60 (64.5)      |
| Don't know                                                                            | 0 (0.0)        | 2 (15.4)       | 4 (19.0)       | 5 (29.4)       | 2 (8.7)        | 13 (14.0)      |

Abbreviations: ABR, annualized bleeding rate; EQ-5D, EuroQoL-5 Dimension; IQR, interquartile range; SD, standard deviation.
